# Supplementary material
Source: ML conference proceedings conference paper supplement (https://www.ecva.net/papers/eccv_2020/papers_ECCV/html/123530766_ECCV_2020_paper.php)
Supplement: Supplementary file 1 [file 123530766-supp.pdf]

## A Appendix

### A.1 Discussion on Framework Robustness

As the proposed framework relies on the SCC from pretrained models, a natural question is raised: **can it still be effective when the pretrained model is weak?**

Table A1 explores the performance of the proposed method using different backbones on the Food-101N dataset. Although ResNet18 has around 2% deficiency on the pretrained model comparing to ResNet50, our framework can still help boost the performance. Moreover, we found that although the advantages from our framework might be affected by a weaker model, it stays effective even with a weaker model AlexNet on Food-101N, showing the robustness of framework.

**Table A1.** Dependence on Pretrained Model Ability

| Backbone         | S1 Top-1 | S2 Top-1 (ours) | S2 Top-1 (ours+GBA) |
|------------------|----------|-----------------|---------------------|
| ResNet18 Vanilla | 82.16    | 83.44           | 83.72               |
| AlexNet Vanilla  | 72.55    | 73.01           | 73.67               |

## A.2 Algorithm

We provide the algorithm block in Algorithm 1 to help readers understand details of our framework.

---

### Algorithm 1 Proposed Method

---

**Input:** Dataset  $\mathcal{D}$ , a pretrained model  $\mathcal{M}_{\theta_0}$  with model parameter  $\theta_0$ .

**Function:** Binary cross entropy  $\mathcal{H}(p, q)$ .

**Output:** Optimal model parameter  $\theta$ .

- 1: Let  $\theta = \theta_0$ .      *#  $\mathcal{M}_\theta$  will be finetuned from  $\mathcal{M}_{\theta_0}$*
- 2: **for**  $(x, y^*) \in \mathcal{D}$  **do**
- 3:    *# prepare for confidence c:*
- 4:     Predictions of  $\mathcal{M}_{\theta_0}$  on  $x$ :  $p(y|x, \theta_0) = \mathcal{M}_{\theta_0}(x)$ .
- 5:     Obtain confidence  $c = p(y_{(\omega)}|x, \theta_0)$ .
- 6:    *# prepare for loss functions:*
- 7:     Obtain augmented  $x' \leftarrow \text{Augment}(x)$ .
- 8:     Predictions of  $\mathcal{M}_\theta$  on  $x'$ :  $p(y|x', \theta) = \mathcal{M}_\theta(x')$ .
- 9:     Webly supervised loss  $\mathcal{L}_w = \mathcal{H}(y^*, p(y|x', \theta))$ .
- 10:    Self-label supervised loss  $\mathcal{L}_s = \mathcal{H}(p(y|x, \theta_0), p(y|x', \theta))$ .
- 11:    *# compute final loss for training:*
- 12:      $\mathcal{L} = c \times \mathcal{L}_w + (1 - c) \times \mathcal{L}_s$ .
- 13:     $\theta \leftarrow \arg \min_{\theta} \mathcal{L}$
- 14: **end for**
- 15: **return**  $\theta$

---
